# Supplementary material
Source: PubMed Central journal article supplement (PMC3090495)
Supplement: NIHMS285520-supplement-1.pdf [file NIHMS285520-supplement-1.pdf]

The following investigators, in addition to those listed as authors, participated in the NICHD NRN's Glutamine Trial:

NRN Steering Committee Chair: Alan H. Jobe, MD PhD, University of Cincinnati; Michael S. Caplan, MD, University of Chicago, Pritzker School of Medicine.

*Alpert Medical School of Brown University* and Women & Infants Hospital of Rhode Island (U10 HD27904) – Betty R. Vohr, MD; Rachel V. Walden, MD; Barbara Alksininis, PNP; Angelita M. Hensman, RN BSN; Martha R. Leonard, BA BS; Lucy Noel; Teresa M. Leach, MEd CAES; Victoria E. Watson, MS CAS.

*Case Western Reserve University* Rainbow Babies & Children's Hospital (GCRC M01 RR80, U10 HD21364) – Avroy A. Fanaroff, MD; Michele C. Walsh, MD MS; Deanne E. Wilson-Costello, MD; Nancy S. Newman, RN; Bonnie S. Siner, RN; Harriet G. Friedman, MA.

*Cincinnati Children's Hospital Medical Center* University of Cincinnati Hospital and Good Samaritan Hospital (GCRC M01 RR8084, U10 HD27853) – Edward F. Donovan, MD; Kurt Schibler, MD; Jean Steichen, MD; Barbara Alexander, RN; Cathy Grisby, BSN CCRC; Marcia Mersmann, RN; Holly L. Mincey, RN BSN; Jody Hessling, RN; Teresa L. Gratton, PA.

*Emory University* Children's Healthcare of Atlanta, Grady Memorial Hospital, and Emory University Hospital Midtown (GCRC M01 RR39, U10 HD27851) – Ira Adams-Chapman, MD; Ellen C. Hale, RN BS CCRC; Maureen Mulligan LaRossa, RN; Sheena Carter, PhD.

*Eunice Kennedy Shriver National Institute of Child Health and Human Development* – Linda L. Wright, MD; Elizabeth M. McClure, MEd.

*Indiana University* Indiana University Hospital, Methodist Hospital, Riley Hospital for Children, and Wishard Health Services (GCRC M01 RR750, U10 HD27856) – James A. Lemons, MD; Anna M. Dusick, MD FAAP; Darlene Kardatzke, MD; Carolyn Lytle, MD MPH; Diana D. Appel, RN BSN; Lon G. Bohnke, MS; Greg Eaken, PhD; Dianne E. Herron, RN; Lucy C. Miller, RN BSN CCRC; Leslie Richard, RN; Leslie Dawn Wilson, BSN CCRC.

*RTI International* (U01 HD36790) – W. Kenneth Poole, PhD; Betty Hastings; Elizabeth M. McClure, Med; Jeanette O'Donnell Auman, BS; Scott E. Schaefer, MS; Sarah Taylor, BSPH.

*Stanford University* Lucile Packard Children's Hospital (GCRC M01 RR70, U10 HD27880) – David K. Stevenson, MD; Susan R. Hintz, MD MS Epi; M. Bethany Ball, BS CCRC; Jean G. Kohn, MD; Joan M. Baran, PhD; Julie C. Lee-Ancajas, PhD; Nicholas H. St. John, PhD.

*University of Alabama at Birmingham* Health System and Children's Hospital of Alabama (GCRC M01 RR32, U10 HD34216) – Waldemar A. Carlo, MD; Namasivayam Ambalavanan, MD; Kathleen G. Nelson, MD; Myriam Peralta-Carcelen, MD MPH; Kirstin J. Bailey, PhD; Fred J. Biasini, PhD; Stephanie A. Chopko, PhD; Monica V. Collins, RN BSN MaEd; Shirley S. Cosby, RN BSN; Vivien A. Phillips, RN BSN; Richard V. Rector, PhD.

*University of California – San Diego* Medical Center and Sharp Mary Birch Hospital for Women (U10 HD40461) – Neil N. Finer, MD; Yvonne E. Vaucher, MD MPH; Jack M. Anderson, MD; Maynard R. Rasmussen MD; Kathy Arnell, RN; Clarence Demetrio, RN; Martha G. Fuller, RN MSN; Chris Henderson, RCP CRTT; Donna Posin, OTR/L MPA.

*University of Miami* Holtz Children's Hospital (GCRC M01 RR16587, U10 HD21397) – Charles R. Bauer, MD; Shahnaz Duara, MD; Amy Mur Worth, RN MS; Ruth Everett-Thomas, RN MSN; Alexis N. Diaz, BA; Elaine O. Mathews, RN; Kasey Hamlin-Smith, PhD; Lisa Jean-Gilles, BA; Maria Calejo, MS; Silvia M. Frade, BA; Silvia Hiriart-Fajardo, MD; Yamiley Gideon, BA.

*University of Tennessee* (U10 HD21415) – Sheldon B. Korones, MD; Henrietta S. Bada, MD; Tina Hudson, RN BSN; Kim Yolton, PhD; Marilyn Williams, LCSW.

*University of Texas Southwestern Medical Center at Dallas* Parkland Health & Hospital System and Children's Medical Center Dallas (GCRC M01 RR633, U10 HD40689) – Abbot R. Laptook, MD; Walid A. Salhab, MD; R. Sue Broyles, MD; Susie Madison, RN; Jackie F. Hickman, RN; Alicia Guzman; Sally S. Adams, MS RN CPNP; Linda A. Madden, BSN RN CPNP; Elizabeth Heyne, PA-C; Cristin Dooley, PhD LSSP.

*Wayne State University* Hutzel Women's Hospital and Children's Hospital of Michigan (U10 HD21385) – Seetha Shankaran, MD; Virginia Delaney-Black, MD MPH; Yvette R. Johnson, MD MPH; Rebecca Bara, RN BSN; Geraldine Muran, RN BSN; Deborah Kennedy, RN BSN; Laura Goldston, MA.

*Yale University* Yale-New Haven Children's Hospital (GCRC M01 RR6022, U10 HD27871) – Patricia Gettner, RN; Monica Konstantino, RN BSN; Elaine Romano, MSN; Nancy Close, PhD; Walter Gilliam, PhD; JoAnn Poulsen, RN.
